# Supplementary material for: Modulations of the work function and morphology of a single MoS2 nanotube by charge injection
Source: Royal Society of Chemistry journal article supplement (doi:10.1039/d4na00490f), 2024-01-01

**Figure S1:** Topography profile of the MoS<sub>2</sub> NT at position B before and after current injections at position C

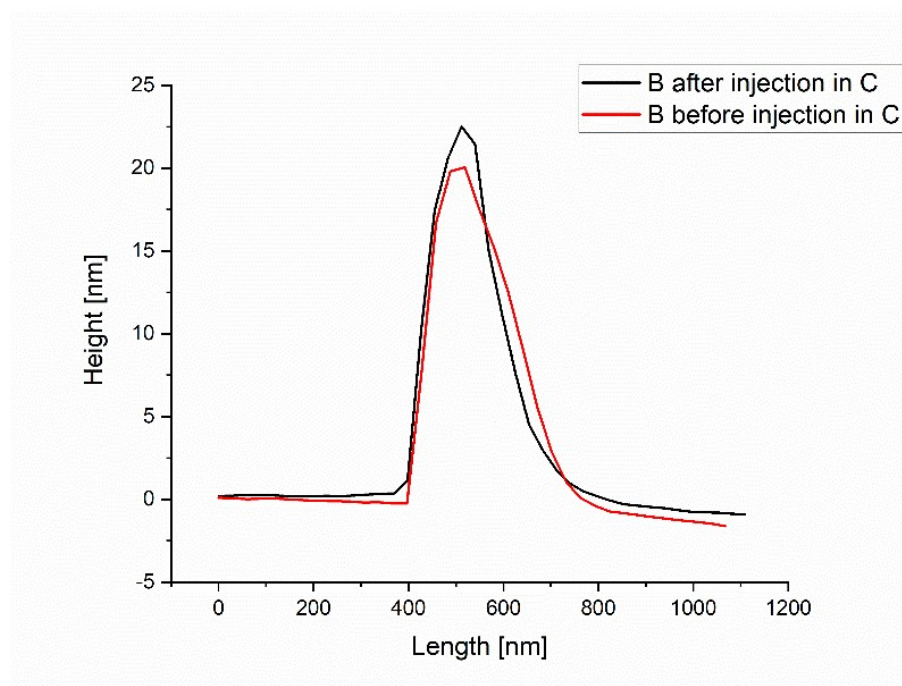

**Figure S2:** Gradual changes in the shape of the NT (a, b) and its CPD profiles (c, d) at the position B due to injections of holes at 2 V, 4 V, 6 V, and 8 V.

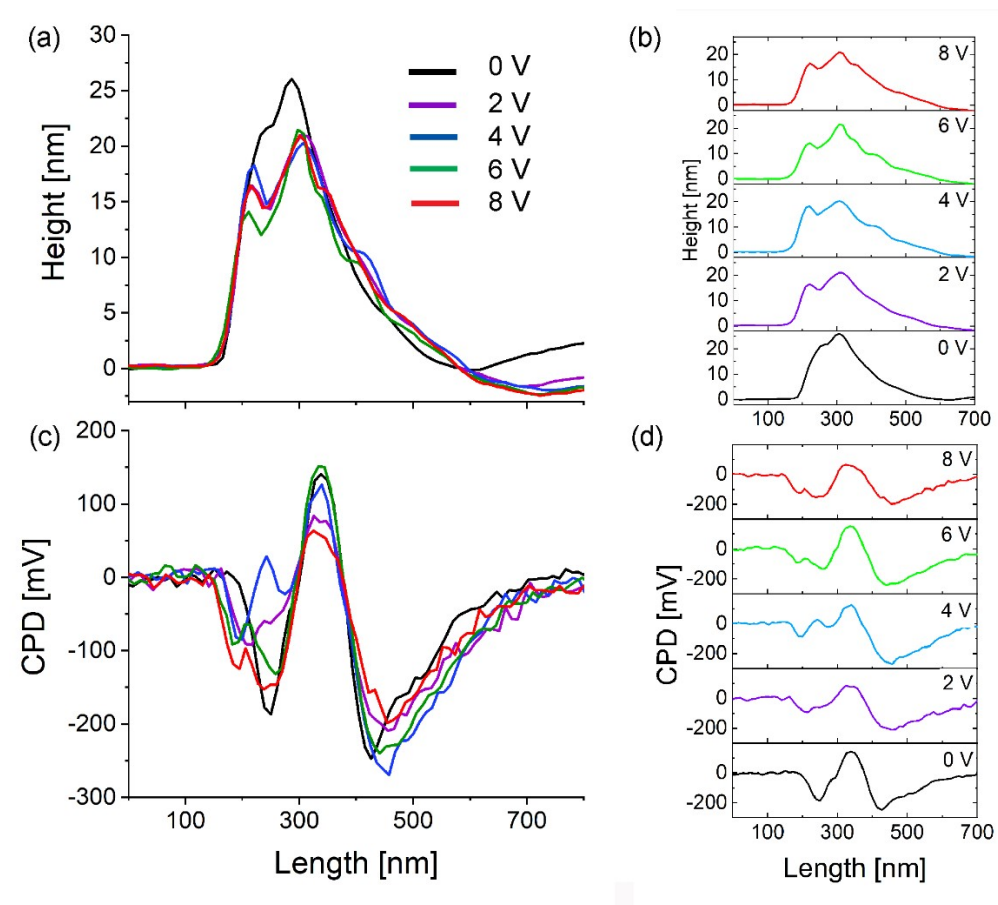

**Figure S3:** Gradual changes in the shape of the NT (a, b) and its CPD profiles (c, d) at the position B due to injections of electrons at -2 V, -4 V, -6 V, and -8 V.

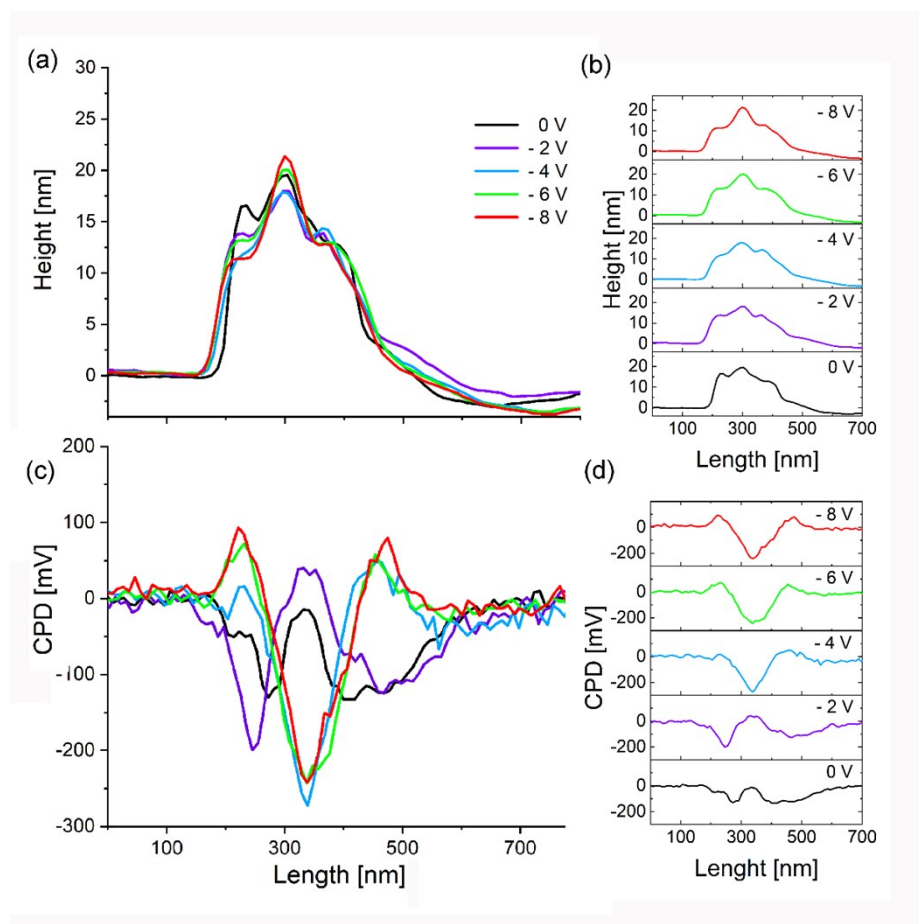

**Figure S4:** SEM image of the MoS<sub>2</sub> NT taken after charge injections

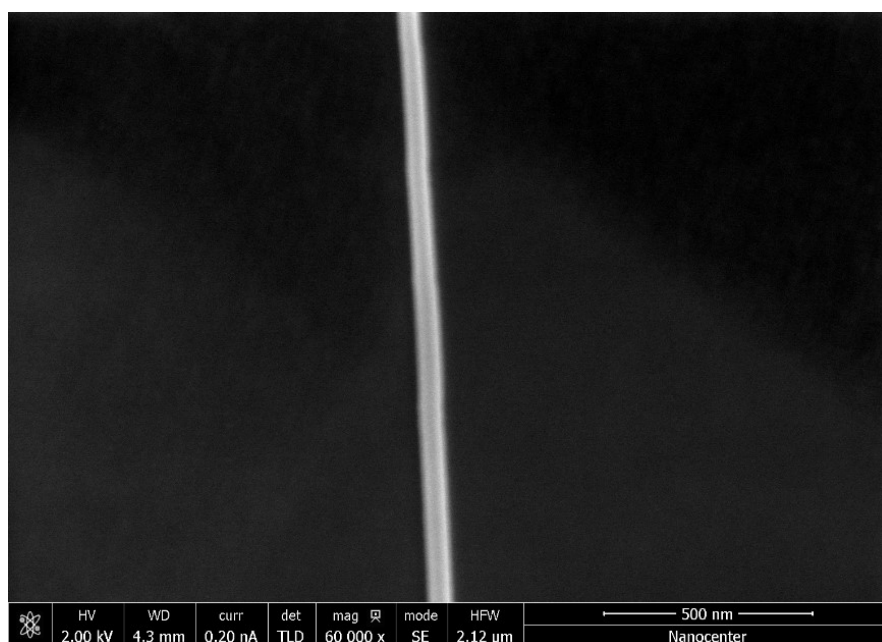

Supplement: d4na00490f1.pdf [file d4na00490f1.pdf]
